# Supplementary material for: Investigation into antifreeze performances of natural amino acids for novel CPA development
Source: Royal Society of Chemistry journal article supplement (doi:10.1039/d3tb00131h), 2023-01-01
Supplement: d3tb00131h1.pdf [file d3tb00131h1.pdf]

## Supporting Information

### Investigation into antifreeze performances of natural amino acids for novel CPA development

Jianfan Ma,<sup>†a</sup> Xiangyu Zhang,<sup>†a</sup> Zhongxin Cui,<sup>a</sup> Meirong Zhao,<sup>a</sup> Lei Zhang,<sup>\*a</sup> and Haishan Qi<sup>\*a</sup>

<sup>a</sup> Department of Biochemical Engineering, Frontier Science Centre for Synthetic Biology and Key Laboratory of Systems Bioengineering (MOE), School of Chemical Engineering and Technology, Tianjin University, Tianjin 300072, China.

<sup>†</sup> JianFan Ma and Xiangyu Zhang contributed equally to this work.

\*Corresponding author: Lei Zhang E-mail: lei\_zhang@tju.edu.cn;

Haishan Qi, E-mail: hsqi@tju.edu.cn.

#### Content

|                                                                                             |   |
|---------------------------------------------------------------------------------------------|---|
| Figure S1. 18 amino acid structures. ....                                                   | 2 |
| Figure S2. Antifreeze function of different concentrations of phenylalanine. ....           | 2 |
| Figure S3. Antifreeze function of different concentrations of Betaine, DMSO, Glycerol. .... | 3 |
| Figure S4. DSC test. ....                                                                   | 4 |
| Figure S5. The F3 values during simulations in phenylalanine (F) solution. ....             | 4 |
| Figure S6. The RBCs' integrity after incubation. ....                                       | 5 |
| Figure S7. The RBCs recovery in different concentration of P solution. ....                 | 5 |
| Figure S8. The RBCs recovery in different amino acids-based CPAs. ....                      | 6 |
| Figure S9. The RBCs recovery in different CPAs. ....                                        | 6 |
| Figure S10. The ATP concentration of RBCs after cryopreservation. ....                      | 7 |

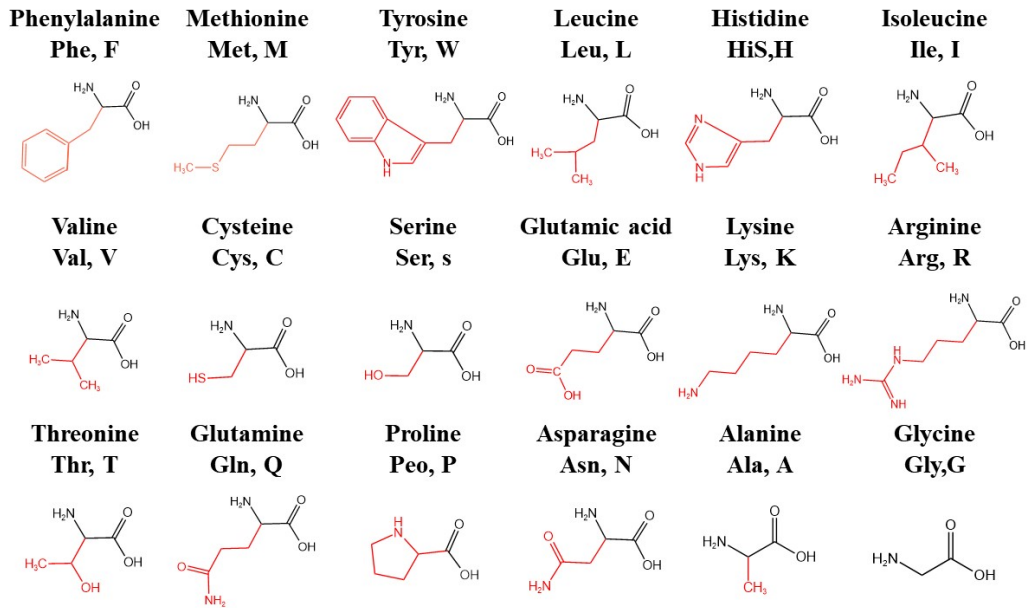

Figure S1. 18 amino acid structures.

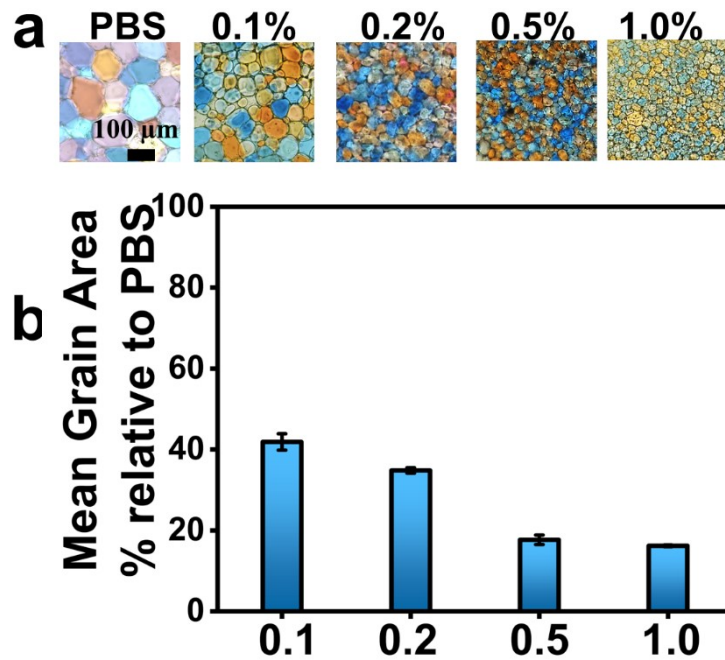

Figure S2. Antifreeze function of different concentrations of phenylalanine. a) Images of ice crystals with different concentrations of F. b) Ice recrystallization inhibition activity of amino acids. Error bars are  $\pm 1$  SD from a minimum of three repeats. The mean grain area relative to PBS.

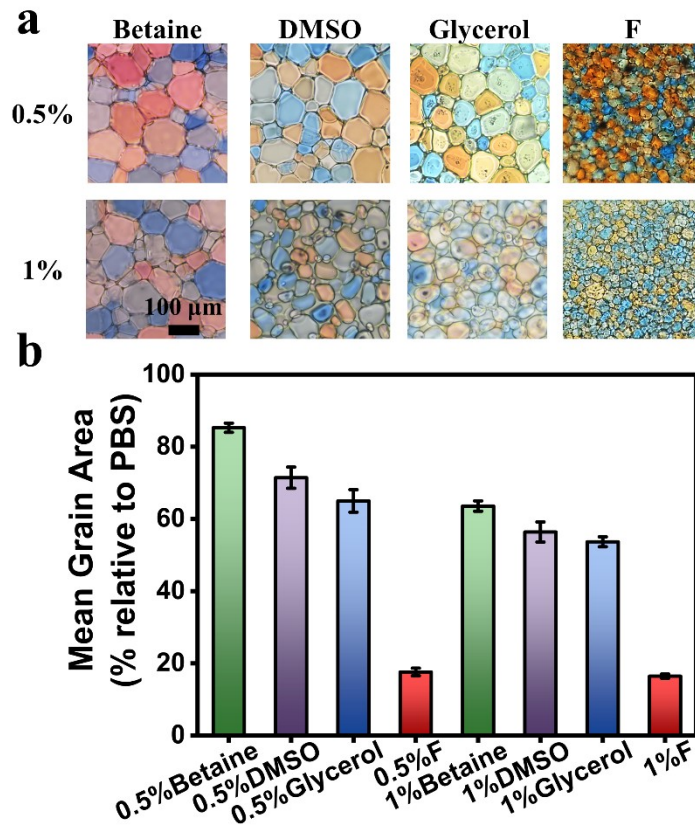

**Figure S3. Antifreeze function of different concentrations of Betaine, DMSO, Glycerol.**  
a) The images of ice crystals. b) Ice recrystallization inhibition activity of simples. Error bars are  $\pm 1$  SD from a minimum of three repeats. The mean grain area relative to PBS.

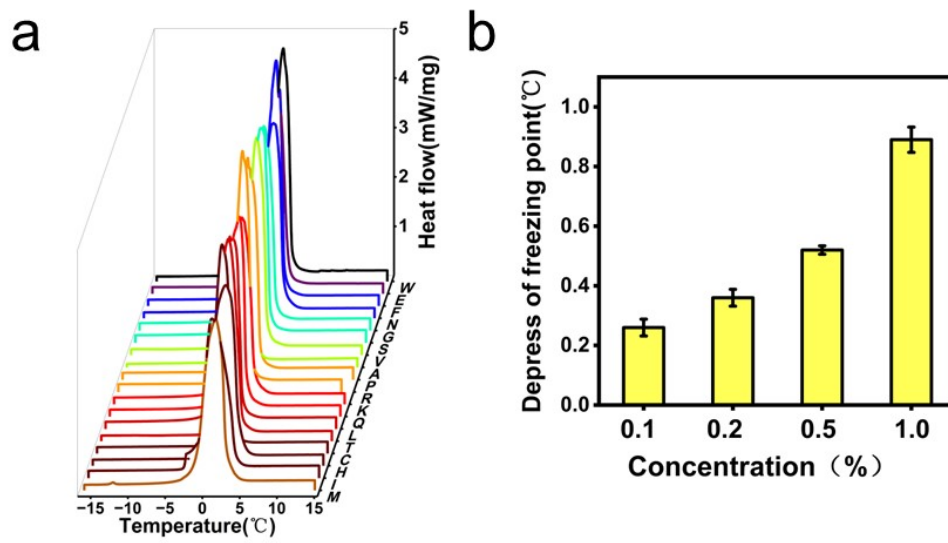

**Figure S4. DSC test.** a) Differential scanning calorimetry (DSC) melting thermograms of amino acids. b) The ability to depress the freeze point with different concentrations of M.

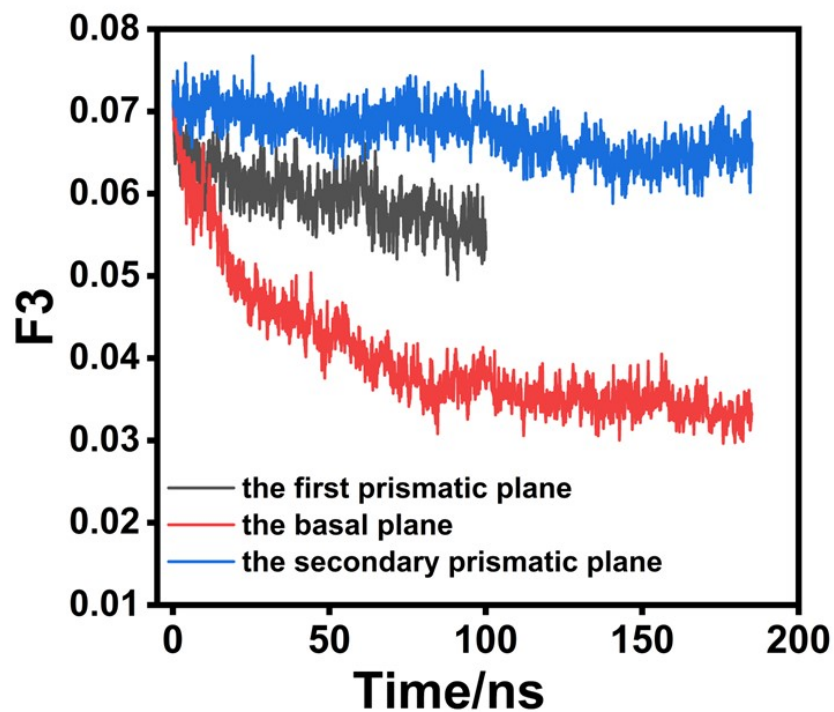

**Figure S5.** The F3 values during simulations in phenylalanine (F) solution.

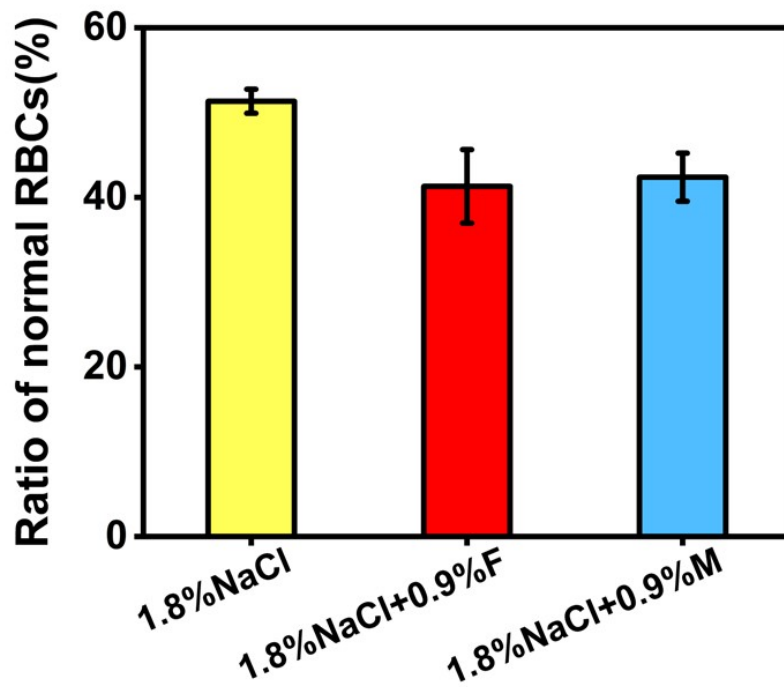

Figure S6. The RBCs' integrity after incubation.

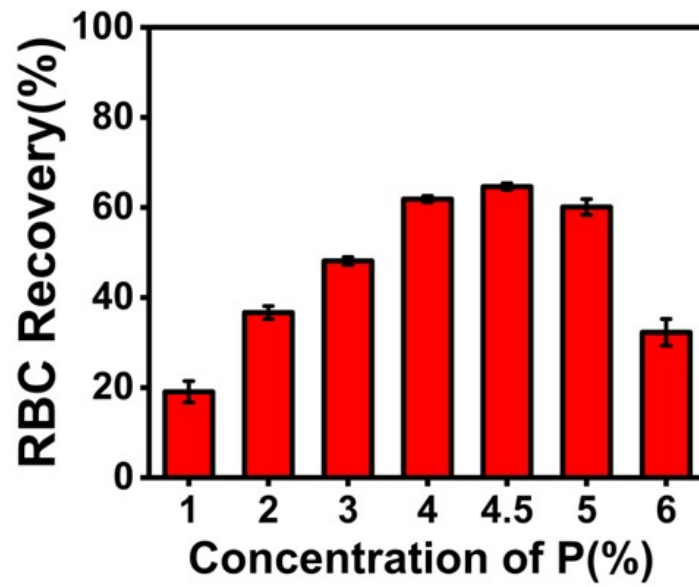

Figure S7. The RBCs recovery in different concentration of P solution.

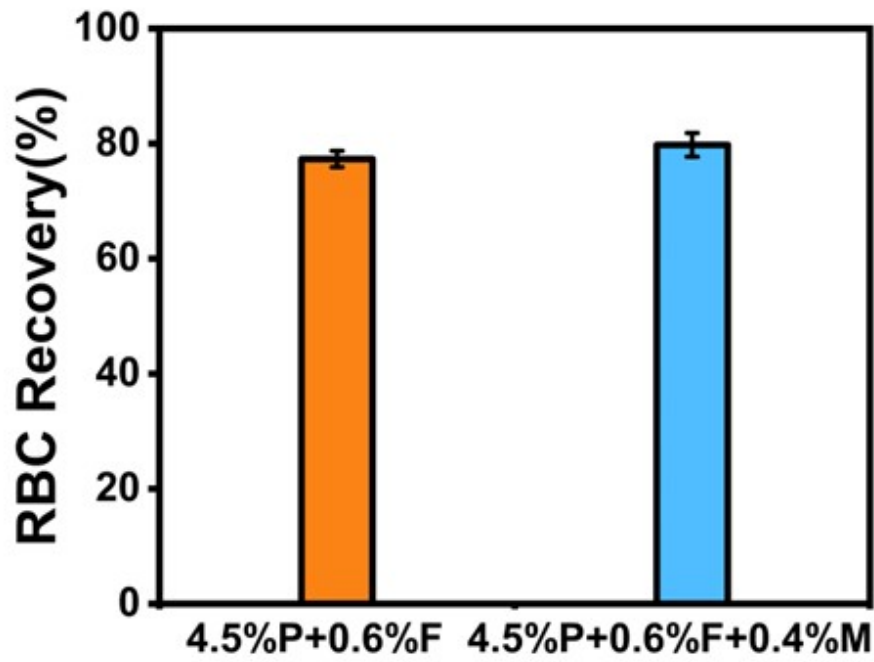

Figure S8. The RBCs recovery in different amino acids-based CPAs.

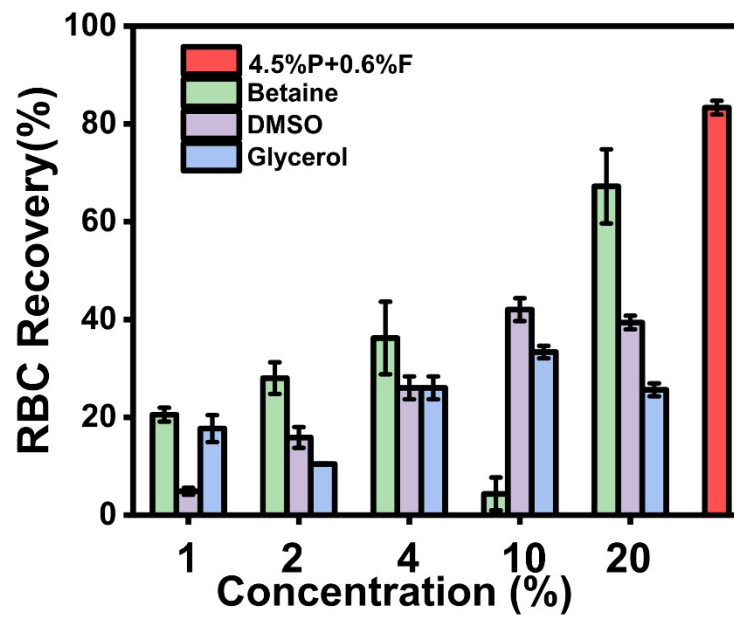

Figure S9. The RBCs recovery in different CPAs.

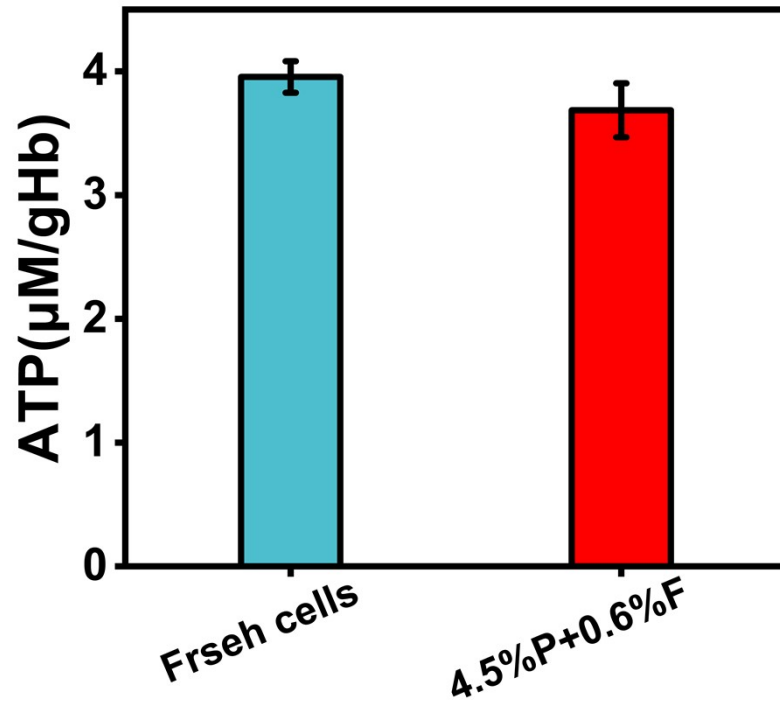

Figure S10. The ATP concentration of RBCs after cryopreservation.
